# Supplementary material for: Effectiveness of Online Food-Safety Educational Programs: A Systematic Review, Random-Effects Meta-Analysis, and Thematic Synthesis
Source: MDPI journal article supplement (doi:10.3390/foods13050794), 2024-03-04
Supplement: s1 [file s1]

## Supplementary Material

**Table S1: Date Databases Accessed**

| Database       | Last Access Date               |
|----------------|--------------------------------|
| Proquest       | August 25 <sup>th</sup> , 2021 |
| PubMed         | August 27 <sup>th</sup> , 2021 |
| Cochrane       | August 27 <sup>th</sup> , 2021 |
| Web of Science | August 30 <sup>th</sup> , 2021 |
| Wiley Online   | August 24 <sup>th</sup> , 2021 |
| EBESCO         | August 30 <sup>th</sup> , 2021 |
| SCOPUS         | August 16 <sup>th</sup> , 2021 |

**Table S2: ROBINS-I assessment summary for studies in the meta-analysis**

| Paper                   | D1 | D2 | D3 | D4 | D5 | D6 | D7 | Overall |
|-------------------------|----|----|----|----|----|----|----|---------|
| Barrett et Al., 2020    | +  | +  | +  | +  | +  | +  | +  | +       |
| Costello et Al., 1997   | X  | +  | +  | +  | +  | +  | +  | X       |
| Dipietro, 2006          | -  | +  | +  | +  | +  | +  | +  | +       |
| Feinstein et Al., 2013  | +  | X  | +  | +  | -  | +  | +  | -       |
| Liceaga et Al., 2014    | +  | +  | +  | +  | +  | +  | +  | +       |
| Lynch et Al., 2008      | -  | +  | +  | +  | +  | +  | +  | +       |
| Quick et Al., 2013      | +  | +  | +  | +  | +  | +  | +  | +       |
| Smith and Shillam, 2000 | X  | +  | +  | +  | -  | +  | +  | X       |
| Strohbehn et Al., 2013  | -  | -  | X  | +  | +  | +  | +  | X       |
| Unusan, 2007            | +  | +  | +  | +  | +  | +  | +  | +       |

|                                                                                   |                         |                                                 |
|-----------------------------------------------------------------------------------|-------------------------|-------------------------------------------------|
|  | = Low risk of bias      | D1- Bias due to confounding                     |
|  | = Moderate risk of bias | D2- Bias in participant selection               |
|  | = Serious risk of bias  | D3- Bias in the classification of interventions |
|                                                                                   |                         | D4- Bias due to deviation from the intervention |
|                                                                                   |                         | D5- Bias due to missing data                    |
|                                                                                   |                         | D6- Bias in the measurement of the outcomes     |
|                                                                                   |                         | D7- Bias in the selection of reported results   |

**Table S3: ROB-2 assessment summary results for studies in the meta-analysis**

| Paper                                                                               | D1                                                                                  | D2                                                                                  | D3                                                                                  | D4                                                                                  | D5                                                                                    | Overall                                                                               |
|-------------------------------------------------------------------------------------|-------------------------------------------------------------------------------------|-------------------------------------------------------------------------------------|-------------------------------------------------------------------------------------|-------------------------------------------------------------------------------------|---------------------------------------------------------------------------------------|---------------------------------------------------------------------------------------|
| Duong et Al., 2020                                                                  |    |    |    |    |    |    |
| Fajardo-Lira et Al., 2006                                                           |    |    |    |    |    |    |
| Fenton et Al., 2006                                                                 |    |    |    |    |    |    |
| Mayer and Harrison, 2012                                                            |  |  |  |  |  |  |
| Walker et Al., 2006                                                                 |  |  |  |  |  |  |
|  | = Low Bias                                                                          |                                                                                     | D1- Bias in the randomization process                                               |                                                                                     |                                                                                       |                                                                                       |
|  | = Some Concerns of Bias                                                             |                                                                                     | D2- Bias due to deviations from procedure                                           |                                                                                     |                                                                                       |                                                                                       |
|                                                                                     |                                                                                     |                                                                                     | D3- Bias due to missing data                                                        |                                                                                     |                                                                                       |                                                                                       |
|                                                                                     |                                                                                     |                                                                                     | D4- Bias due measurement of outcomes                                                |                                                                                     |                                                                                       |                                                                                       |
|                                                                                     |                                                                                     |                                                                                     | D5- Bias due to selective reporting                                                 |                                                                                     |                                                                                       |                                                                                       |

**Figure S1: Study-level individual effect sizes**

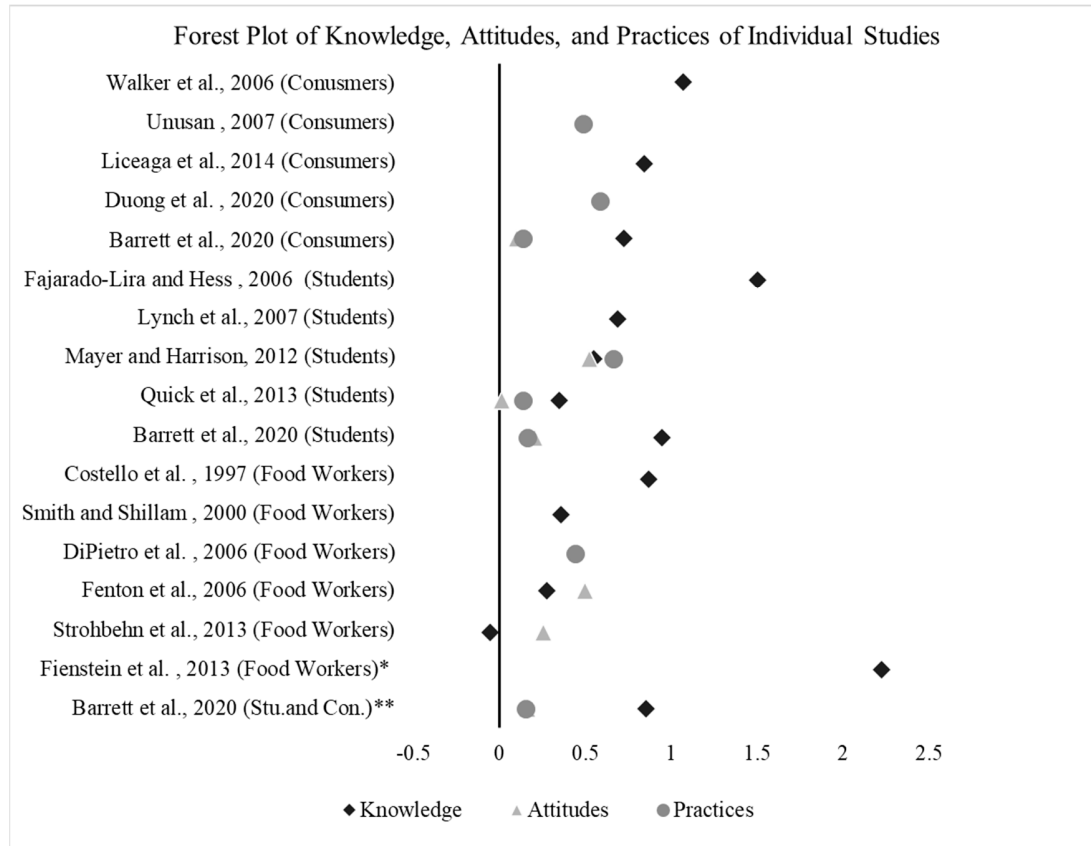

Figure S1: Hedge's G effect size for Knowledge, Attitudes and Practices of each study  
*Any missing effect size is due to the study not reporting on that outcome.*  
 \*\* Combined value of Students and Consumers from study using a fixed effect weighed hedge's G  
 \*Removed from the calculation of the subpopulation's effect size
