# Supplementary material for: Effectiveness of Online Food-Safety Educational Programs: A Systematic Review, Random-Effects Meta-Analysis, and Thematic Synthesis
Source: Foods. 2024 Mar 4;13(5):794. doi: 10.3390/foods13050794 (PMC10931379; doi:10.3390/foods13050794)
Supplement: Supplementary file 1 [file foods-13-00794-s001.zip]

Archive with 7 entries (7 files):
- GRADE_CERQual_Groups_Spreadsheet_S1.xlsx
- GRADE_CERQual_Individual_Papers_Spreadsheet_S2.xlsx
- GRADE_Groups_Spreadhseet_S3.xlsx
- GRADE_Individual_Papers_SpreadhseetsS4.xlsx
- PRISMA_2020_Document_S1.pdf
- Spreadsheet S5 .xlsm
- Supplementary Tables and Figures.pdf
