# Supplementary material for: Effectiveness of Online Food-Safety Educational Programs: A Systematic Review, Random-Effects Meta-Analysis, and Thematic Synthesis
Source: Foods. 2024 Mar 4;13(5):794. doi: 10.3390/foods13050794 (PMC10931379; doi:10.3390/foods13050794)
Supplement: Supplementary file 1 [file foods-13-00794-s001.zip › GRADE_CERQual_Groups_Spreadsheet_S1.xlsx]

## Sheet: Methodological Limitations
Group	>50% of papers in the group have unaddressed potential for interpersonal or researcher induced bais	<50% of papers have data collected in a way that best answers our research question	<50% of the data analysis is sifgnificantly rigorous	<50% of the papers had ideal recruitment strategy appropriate to the aims of the research	Total
Students					0
Food Workers	x	x			-2
Consumers	x	x			-2
All	x	x			-2

## Sheet: Coherence
Group	There is conflicting results and observations of papers withing group	>33% of the theme references come from scientific observaiton and not participant feedbacl	>30% of the themes are based off deductive logic	Groups has a 2nd order construct desnity of >1	Total
Students		x		x	-2
Food Workers		x		x	-2
Consumers		x		x	-2
All		x		x	-2

## Sheet: Adequacy of the data
Group	Number of studies in group is >=3	>50% of created themes include 2 or more in the group	>10% of references in the group come from 1st order constructs	Total
Students	x	x		2
Food Workers	x	x	x	3
Consumers	x	x		2
All	x	x		2

## Sheet: Relevance
Group	Methodology	Population Coherence	Total
Students	-1	-2	-3
Food Workers	-1	-2	-3
Consumers	-1	-4	-5
All	-1	-4	-5

## Sheet: Totals
Group	Totals
Students	-3
Food Workers	-4
Consumers	-7
All	-7
