# Supplementary material for: Effectiveness of Online Food-Safety Educational Programs: A Systematic Review, Random-Effects Meta-Analysis, and Thematic Synthesis
Source: Foods. 2024 Mar 4;13(5):794. doi: 10.3390/foods13050794 (PMC10931379; doi:10.3390/foods13050794)
Supplement: Supplementary file 1 [file foods-13-00794-s001.zip › GRADE_CERQual_Individual_Papers_Spreadsheet_S2.xlsx]

## Sheet: Methodological Limitations
Title	Consumers	Students	College Students	Young Students	Food Workers	Kitchen Food Workers	Paper has unadressed potential for interpersonal or researcher induced bias		Papers have data collected in a way that best answers our research question		Data analysis is sufficenetly rigourous		Papers have ideal recruitment strategies		Total	completed
Fenton et Al., 2006	x				x		x	1	x	0	x	0	x	0	1	x
Fajardo-lira and heiss, 2006	x	x	x					0	x	0	x	0	x	0	0	x
Lynch et Al., 2008		x		x				0	x	0	x	0		1	1	x
Dudeja et Al., 2008	x				x	x	x	1		1	x	0		1	3	x
Costello et Al., 1997	x				x	x	x	1		1	x	0	x	0	2	x
Dipietro, 2008	x				x	x		0		1	x	0	x	0	1	x
Temen et Al., 2020	x				x	x	x	1		1	x	0		1	3	x
Padua et Al., 2020	x						x	1		1	x	0		1	3	x
Duong et Al., 2020	x						x	1		1	x	0		1	3	x
Trepka et Al., 2010	x						x	1	x	0	x	0	x	0	1	x
Kosa et Al., 2011	x						x	1		1	x	0	x	0	2	x
Debacq et Al., 2020	x	x	x				x	1	x	0	x	0	x	0	1	x
Evans et Al., 2021					x		x	1		1	x	0		1	3	x
Mayer and Harrison, 2012	x	x	x					0		1	x	0		1	2	x

## Sheet: Coherence
Title	Consumers	Students	College Students	Young Students	Food Workers	Kitchen Food Workers			Number of Deductive/non-implicit codings		Number of 2nd order constructs		Number of first order constructs	*	amount of nodes		2nd order density	min	first order density	max	deductive coding density		coding density		1st order ratio
Fenton et Al., 2006	x				x				4		16		5		17		0.941176		0.294118		0.235294		1.23529		0.238095
Fajardo-lira and heiss, 2006	x	x	x						3		8		0		6		1.33333		0		0.5		1.33333		0
Lynch et Al., 2008		x		x					2		21		0		20		1.05		0		0.1		1.05		0
Dudeja et Al., 2008	x				x	x			0		1		0		1		1		0		0		1		0
Costello et Al., 1997	x				x	x			1		7		0		6		1.16667		0		0.166667		1.16667		0
Dipietro, 2008	x				x	x			1		8		0		4		2		0		0.25		2		0
Temen et Al., 2020	x				x	x			0		7		0		6		1.16667		0		0		1.16667		0
Padua et Al., 2020	x								1		1		0		1		1		0		1		1		0
Duong et Al., 2020	x								0		2		0		2		1		0		0		1		0
Trepka et Al., 2010	x								0		3		1		4		0.75		0.25		0		1		0.25
Kosa et Al., 2011	x								0		1		0		1		1		0		0		1		0
Debacq et Al., 2020	x	x	x						0		40		0		26		1.53846		0		0		1.53846		0
Evans et Al., 2021					x				0		0		2		2		0		1		0		1		1
Mayer and Harrison, 2012	x	x	x						1		11		0		7		1.57143		0		0.142857		1.57143		0
											126		8
											0.940299

## Sheet: Relevance
Title	Consumers	Students	College Students	Young Students	Food Workers	Kitchen Food Workers			Exact Population		Methodology
Fenton et Al., 2006	x				x				Food Processing Plant employees from Pennsylvania		Computer slideshow program (asynchronous, non-interactive)
Fajardo-lira and heiss, 2006	x	x	x						Food Science and nutrition students from CSUN		Web-based tutorial (asynchronous, non-interactive)
Lynch et Al., 2008		x		x					Middle school students across the Midwest and east coast US		Web-based program (semi-synchronous, interactive)
Dudeja et Al., 2008	x				x	x			Hospital food handlers in India		A short film and short documentary (asynchronous, non-interactive)
Costello et Al., 1997	x				x	x			Floridian Quick Service Restaurant Chain Employees		Interactive Computer Program (asynchronous, interactive)
Dipietro, 2008	x				x	x			Midwest quick service hamburger restaurant managers		Interactive Media Training (Semi-synchronous, interactive)
Temen et Al., 2020	x				x	x			Iowan home food operators		Web-based program with webinar (Synchronous, interactive)
Padua et Al., 2020	x								Portuguese professionals of education and catering		Web-based video training modules (asynchronous, non-interactive
Duong et Al., 2020	x								US convenience sampling		Video (Asynchronous, non-interactive)
Trepka et Al., 2010	x								Florida WIC clinic visitors		Freestanding Digital Kiosks with a computer based program (Asynchronous, non-interactive)
Kosa et Al., 2011	x								70-75 year old Americans whInformational Website (Asynchronous, non-interactive) o’ve completed high school		web-site non-interative
Debacq et Al., 2020	x	x	x						French MS Food engineering students		Virtual Course (Semi-Synchronous, interactive)
Evans et Al., 2021					x				Non-SALSA certified small and medium scaled food processors from Whales		Self-Assessment Survey (Asynchronous, non-interactive
Mayer and Harrison, 2012	x	x	x						Food Science and Nutrition College Students from university of Georgia		Facebook pages and videos (Asynchronous, interactive)
Grade for group
-1			-1
-2		-2			-2	-2
-3
-4	-4
-5
				-6
Method of Recruitment
	-1	-1	-1		-1	0

## Sheet: Total
Title	Consumers	Students	College Students	Young Students	Food Workers	Kitchen Food Workers	Total
Fenton et Al., 2006	x				x
Fajardo-lira and heiss, 2006	x	x	x
Lynch et Al., 2008		x		x
Dudeja et Al., 2008	x				x	x
Costello et Al., 1997	x				x	x
Dipietro, 2008	x				x	x
Temen et Al., 2020	x				x	x
Padua et Al., 2020	x
Duong et Al., 2020	x
Trepka et Al., 2010	x
Kosa et Al., 2011	x
Debacq et Al., 2020	x	x	x
Evans et Al., 2021					x
Mayer and Harrison, 2012	x	x	x
