# Supplementary material for: Effectiveness of Online Food-Safety Educational Programs: A Systematic Review, Random-Effects Meta-Analysis, and Thematic Synthesis
Source: Foods. 2024 Mar 4;13(5):794. doi: 10.3390/foods13050794 (PMC10931379; doi:10.3390/foods13050794)
Supplement: Supplementary file 1 [file foods-13-00794-s001.zip › GRADE_Groups_Spreadhseet_S3.xlsx]

## Sheet: Study limitations
Group		>=50% of trials are confounding in the effect of interventions		60% of the trials have unclear outcomes and errors in the measure of that outcomes		>60 of the trials have unexplainable missing data		50% the intervention is related accordingly to the group defined in the start of the study		>60% of the participants represent bias in the study and does not exist a technique to control that bias		Total
Consumers Knowledge	9	x	-1		0		0		0	x	-1	-2
Food Workers Knowledge		x	-1		0		0		0	x	-1	-2
Students Knowledge		x	-1		0		0		0	x	-1	-2
All Knowledge	12	x	-1		0		0		0	x	-1	-2
Consumer Practices	5	x	-1	x	-1		0		0	x	-1	-3
Consumer Attitudes	4	x	-1	x	-1		0		0	x	-1	-3
Students Practices	3	x	-1	x	-1		0		0	x	-1	-3
All Practices	6	x	-1	x	-1		0		0	x	-1	-3
Food Workers Additude	2	x	-1	x	-1		0		0	x	-1	-3
Students Additude	3	x	-1	x	-1		0		0	x	-1	-3
All additude	5		0	x	-1		0		0	x	-1	-2
			0		0		0		0		0	0
			0		0		0		0		0	0

## Sheet: Inconsistency
Group		Low or moderate inconsistency: (10%<I^2<30%, Tau < 0.1)		Moderate or High inconsistency (30%<I^2<60%, 0.1<Tau <0.3		High inconsistency: large heterogeneity in populations, treatments, outcomes and biases and indirect evidence		Total
Consumers Knowledge		x	-1		0		0	-1
Food Workers Knowledge			0	x	-2		0	-2
Students Knowledge		x	-1		0		0	-1
All Knowledge			0	x	-2		0	-2
Consumer Practices		x	-1		0		0	-1
Consumer Attitudes			0		0		0	0
Students Practices			0	x	-2		0	-2
All Practices			0	x	-2		0	-2
Food Workers Additude			0		0		0	0
Students Additude		x	-1		0		0	-1
All additude		x	-1		0		0	-1
			0		0		0	0
			0		0		0	0

## Sheet: Imprecision
Group		>50% of trials have a clinically relevant effect sizes excluded from the confidence limits
Consumers Knowledge			0			done
Food Workers Knowledge			0			done
Students Knowledge		x	-1
All Knowledge			0			done
Consumer Practices			0			done
Consumer Attitudes		x	-1
Students Practices		x	-1
All Practices			0			done
Food Workers Additude			0			"-5 for n=2
Students Additude		x	-1
All additude			0			done
			0
			0

## Sheet: Publlication bias
Group		Detected or suspected but with the presence of contour-enhances funnel plots		Detected or suspected without the presence of contour-enhances funnel plots		Group has less than 3 paper		Total
Consumers Knowledge			0		0		0	0
Food Workers Knowledge			0		0		0	0
Students Knowledge			0		0		0	0
All Knowledge			0		0		0	0
Consumer Practices		x	-1		0		0	-1
Consumer Attitudes			0		0		0	0
Students Practices		x	-1		0		0	-1
All Practices		x	-1		0		0	-1
Food Workers Additude			0		0	x	-5	-5	("remember -5 for N=2")
Students Additude			0		0		0	0
All additude			0		0		0	0
			0		0		0	0
			0		0		0	0
			Completed

## Sheet: Upgrading criteria
Group		> 60% of studies have presence of limitaions analysis or attempts to measure bias or other variable (Not demographics)		>60% of the trials have demographics accounted for and/or have taken into account individuals with prior food safety knowledge/training		>=33% randomized questions or subjective evaluations criteria appears in random orders on pre and post evaluation		>=60% of the trails have data that compares a control and not a pre-post value		>=40% of the Studies included is RCT designed for individual participants		Total
Consumers Knowledge	9		0		0		0		0		0	0
Food Workers Knowledge			0	x	1		0		0		0	1
Students Knowledge	5	x	1	x	1		0		0	x	1	3
All Knowledge	12		0		0		0		0		0	0
Consumer Practices	5	x	1		0		0		0	x	1	2
Consumer Attitudes		x	1	x	1		0		0	x	1	3
Students Practices		x	1	x	1	x	1	x	1		0	4
All Practices	6		0		0		0	x	1		0	1
Food Workers Additude			0	x	1	x	1		0	x	1	3
Students Additude		x	1	x	1	x	1	x	1		0	4
All additude		x	1	x	1	x	1	x	1	x	1	5
			0		0		0		0		0	0
			0		0		0		0		0	0
		0.6		0.6		0.33		0.6		0.4

## Sheet: Final Total
Group		TOTAL	Ranking
Consumers Knowledge		-3	5
Food Workers Knowledge		-3	5
Students Knowledge		-1	2
All Knowledge		-4	9
Consumer Practices		-3	5
Consumer Attitudes		-1	2
Students Practices		-3	5
All Practices		-5	10
Food Workers Additude		-5	10
Students Additude		-1	2
All additude		2	1
