# Supplementary material for: Effectiveness of Online Food-Safety Educational Programs: A Systematic Review, Random-Effects Meta-Analysis, and Thematic Synthesis
Source: Foods. 2024 Mar 4;13(5):794. doi: 10.3390/foods13050794 (PMC10931379; doi:10.3390/foods13050794)
Supplement: Supplementary file 1 [file foods-13-00794-s001.zip › GRADE_Individual_Papers_SpreadhseetsS4.xlsx]

## Sheet: Study limitations
Title	Consumers	Workers	Kitchen Food Workers	Students	Young Students	College Students	Paper ID	trials are confounding in the effect of interventions		trials have unclear outcomes and errors in the measure of that outcomes, using in the meta-analysis required assumption of variance from an unclear P-value, or used an unreliable measure for the outcome		trials have unexplainable missing data		the intervention was adjusted based on the group which creates result bias		unequal or unclear demographics between groups could be a source of bias or other sources of bias is evident in the study		Total
An Evaluation of food safety trining using videotaped instruction	x	x	x				M2	x	-1	x	-1		0	x	-1	x	-1	-4
Ninja Kitchen to the rescue: Evaluation of a food safety education gamefor middle school youth				x	x		M3		0		0		0		0	x	-1	-1
EVALUATING THE EFFECTIVENESS OF TWO INSTRUCTIONAL TECHNIQUES FOR TEACHING FOOD SAFETY PRINCIPLES TO QUICK SERVICE EMPLOYEES C. COSTELLO'.*, T. GADDIS', M. TAh4PLIN3 and W. MORRIS'	x	x	x				M4		0	x	-1		0		0	x	-1	-2
Comparison of Knowledge andAttitudes Using Computer-based andFace-to-Face Personal HygieneTraining Methods in FoodProcessing Facilities	x	x					M5		0		0		0		0	x	-1	-1
Delivering Food Safety Education toMiddle School Students Using aWeb-Based, Interactive, Multimedia,Computer Program				x	x		M6	x	-1		0		0		0	x	-1	-2
Safe Eats: An Evaluation of the Use of Social Media for FoodSafety Education	x			x		x	M7	x	-1	x	-1		0		0	x	-1	-3
Return on Investment in Managerial Training	x	x					M8 P	x	-1	x	-1		0		0	x	-1	-3
E-mail delivery of hygieneeducation to university personneL**	x						M9 P	x	-1	x	-1		0		0	x	-1	-3
Evaluation of the Fight BAC!The Story of Your DinnerCampaignVideo: A Multistate Study	x			x			M10	x	-1		0		0		0	x	-1	-2
The usefulness of computer-based instruction in providing educational opportunities for nursing staff	x	x	x				M11	x	-1		0		0		0	x	-1	-2
Effectiveness of Food Safety Managerial Training:Face-to-Face or Computer-Based Delivery	x	x					M12	x	-1	x	-1		0		0	x	-1	-3
Increasing content knowledge and self-efficacy of high school educators through an online course in food science	x						M13	x	-1		0		0		0	x	-1	-2
Assessing the effectiveness of servsafe® online	x	x					M14	x	-1		0		0	x	-1	x	-1	-3
An observational study of thermometer	x						M15 P		0	x	-1	x	-1		0		0	-2
Comparing the Effectiveness of a Supplemental Computer-Based Food Safety Tutorial to Traditional Education in an Introductory Food Science Course				x		x	M16		0		0		0		0	x	-1	-1
Ninja Kitchen to the rescue: Evaluation of a food safety education gamefor middle school youth				x	x		M3 A		0	x	-1		0		0	x	-1	-2
Ninja Kitchen to the rescue: Evaluation of a food safety education gamefor middle school youth				x	x		M3 P		0	x	-1		0		0	x	-1	-2
Comparison of Knowledge andAttitudes Using Computer-based andFace-to-Face Personal HygieneTraining Methods in FoodProcessing Facilities	x	x					M5 A		0	x	-1		0		0	x	-1	-2
Safe Eats: An Evaluation of the Use of Social Media for FoodSafety Education	x			x		x	M7 A	x	-1	x	-1		0		0	x	-1	-3
Safe Eats: An Evaluation of the Use of Social Media for FoodSafety Education	x			x		x	M7 P	x	-1	x	-1		0		0	x	-1	-3
Evaluation of the Fight BAC!The Story of Your DinnerCampaignVideo: A Multistate Study	x			x			M10 A	x	-1		0		0		0	x	-1	-2
Evaluation of the Fight BAC!The Story of Your DinnerCampaignVideo: A Multistate Study	x			x			M10 P	x	-1		0		0		0	x	-1	-2
Effectiveness of Food Safety Managerial Training:Face-to-Face or Computer-Based Delivery	x	x					M12 A	x	-1	x	-1		0		0	x	-1	-3
M2 screens for poor performers, not as much as M14	Cat for K done	Cat for K done	Cat for K done	Cat for K done	Cat for K done
All K done	Cat for P done	Cat for A is done		Cat for A done
All P done	Cat for A Done			Cat for P done
All A done

## Sheet: Upgrading criteria
Title	Consumers	Workers	Kitchen Food Workers	Students	Young Students	College Students	Paper ID	studies have presence of limitaions analysis or attempts to measure bias or other variable (Not demographics)		trials have demographics accounted for and/or have taken into account individuals with prior food safety knowledge/training		randomized questions or subjective evaluations criteria appears in random orders on pre and post evaluation		Data compares a control and not a pre-post value		Study is RCT of individual participants		Total
An Evaluation of food safety trining using videotaped instruction	x	x	x				M2		0		0		0		0		0	0
Ninja Kitchen to the rescue: Evaluation of a food safety education gamefor middle school youth				x	x		M3		0	x	1	x	1	x	1		0	3
EVALUATING THE EFFECTIVENESS OF TWO INSTRUCTIONAL TECHNIQUES FOR TEACHING FOOD SAFETY PRINCIPLES TO QUICK SERVICE EMPLOYEES C. COSTELLO'.*, T. GADDIS', M. TAh4PLIN3 and W. MORRIS'	x	x	x				M4		0		0		0	x	1		0	1
Comparison of Knowledge andAttitudes Using Computer-based andFace-to-Face Personal HygieneTraining Methods in FoodProcessing Facilities	x	x					M5	x	1	x	1	x	1	x	1	x	1	5
Delivering Food Safety Education toMiddle School Students Using aWeb-Based, Interactive, Multimedia,Computer Program				x	x		M6	x	1		0		0		0		0	1
Safe Eats: An Evaluation of the Use of Social Media for FoodSafety Education	x			x		x	M7	x	1		0		0	x	1	x	1	3
Return on Investment in Managerial Training	x	x					M8 P		0		0		0	x	1		0	1
E-mail delivery of hygieneeducation to university personneL**	x						M9 P		0	x	1		0		0		0	1
Evaluation of the Fight BAC!The Story of Your DinnerCampaignVideo: A Multistate Study	x			x			M10	x	1	x	1		0		0		0	2
The usefulness of computer-based instruction in providing educational opportunities for nursing staff	x	x	x				M11		0	x	1		0		0	x	1	2
Effectiveness of Food Safety Managerial Training:Face-to-Face or Computer-Based Delivery	x	x					M12		0	x	1		0		0		0	1
Increasing content knowledge and self-efficacy of high school educators through an online course in food science	x						M13		0		0		0		0		0	0
Assessing the effectiveness of servsafe® online	x	x					M14		0	x	1		0		0		0	1
An observational study of thermometer	x						M15 P	x	1		0		0	x	1	x	1	3
Comparing the Effectiveness of a Supplemental Computer-Based Food Safety Tutorial to Traditional Education in an Introductory Food Science Course				x		x	M16	x	1	x	1		0		0	x	1	3
Ninja Kitchen to the rescue: Evaluation of a food safety education gamefor middle school youth				x	x		M3 A		0	x	1	x	1	x	1		0	3
Ninja Kitchen to the rescue: Evaluation of a food safety education gamefor middle school youth				x	x		M3 P		0	x	1	x	1	x	1		0	3
Comparison of Knowledge andAttitudes Using Computer-based andFace-to-Face Personal HygieneTraining Methods in FoodProcessing Facilities	x	x					M5 A	x	1	x	1	x	1	x	1	x	1	5
Safe Eats: An Evaluation of the Use of Social Media for FoodSafety Education	x			x		x	M7 A	x	1		0		0	x	1	x	1	3
Safe Eats: An Evaluation of the Use of Social Media for FoodSafety Education	x			x		x	M7 P	x	1		0		0	x	1	x	1	3
Evaluation of the Fight BAC!The Story of Your DinnerCampaignVideo: A Multistate Study	x			x			M10 A	x	1	x	1		0		0		0	2
Evaluation of the Fight BAC!The Story of Your DinnerCampaignVideo: A Multistate Study	x			x			M10 P	x	1	x	1		0		0		0	2
Effectiveness of Food Safety Managerial Training:Face-to-Face or Computer-Based Delivery	x	x					M12 A		0	x	1		0		0		0	1
										_____				_______

## Sheet: Sheet1
Paper ID	Total	done
M2	-4	x
M3 K	2	x
M4	-1	x
M5 K	4	x
M6	-1	x
M7 K	0	x
M8 P	-2	x
M9 P	-2	x
M10 K	0	x
M11 K	0	x
M12 K	-2	x
M13	-2	x
M14	-2	x
M15	1	x
M16	2	x
M3 A	1	x
M3 P	1	x
M5 A	3	x
M7 A	0	x
M7 P	0	x
M10 A	0	x
M10 P	0	x
M12 A	-2	x
