# Supplementary material for: Effectiveness of Online Food-Safety Educational Programs: A Systematic Review, Random-Effects Meta-Analysis, and Thematic Synthesis
Source: Foods. 2024 Mar 4;13(5):794. doi: 10.3390/foods13050794 (PMC10931379; doi:10.3390/foods13050794)
Supplement: Supplementary file 1 [file foods-13-00794-s001.zip › Spreadsheet S5 .xlsm]

## Sheet: README
The first tabs are summries of the results outcomes and their forest plots.
Additionally, the first tab is a plot of the overall effect sizes
See below for the rest of the tabs in the spreadsheet
This supplementary material contains the following information
1. Funnel Plots for each outcome and subpopulation (On tabs with Plot label)
2. Forest Plots for each outcome and subpopulation (On tabs with plot label)
3. A Tau^2 hypothesis test to see if it is statistically distant from 0, this requires Xrealstat, or some other method to return the non-central Chi-squared distribution with a non-centrality parameter lamnda (on tabs without plot label)
4. I^2 confidence interval calculations (On tabs without plot label)
5. Q hypothesis testing to check for heterogenity (On tabs without plot label)
You will find individual effect size calulcations (not how they were calculated) and intermediary calculations for Tau^2 (On tabs without plot label)
6. Within the Macros, you will find the iteraive REML calculations to estimate Tau^2, they require the selection of the initial Tau^2 calulcation, which can be calculated as the Dersimmonian-Laird method of moments (on tabs without plot label)
SEE CONSUMER KNOWLEDGE TAB FOR TEMPLATE AS TO LOCATION OF ITEMS 3,4,5, and 6

## Sheet: Main Population Composite Resul
	X
Practices (N=5)	0.420338	0.5
Attitudes (N=5)	0.291597	1.5
Knowledge (N=14)	0.575727	2.5
	Low
	0.2	0
	0.2	3
	0.5	0
Moderate	0.5	3
High	0.8	0
	0.8	3

## Sheet: Random-Effects analy sum(know)
Group	Average Hedge's G	CI range	PI Range	P value	I^2	Tau^2	Tau^2 P-Value	Q P-Value	Upper I^2 95% CI	Lower I^2 95% CI	Number of Papers
Consumers	0.742312	0.110799	0.138325	0	0	0	0.05	#VALUE!	93.2773	0	3
Food Workers	0.379383	0.159189	0.258475	2.99586e-06	22.7101	0	0.05*	0.41304	63.7858	0	5
Kitchen Food Workers	0.613705	0.464578	4.85228	0.00962136	0*	0.0896515	0.12084	0.191359	98.0979*	0*	3	Q = 1.68
Students*	0.719826	0.297348	1.09006	2.08707e-06	18.671	0.0943067	0.199421	#VALUE!	59.3369	0	5
Young Students	#REF!	#REF!	#REF!	#REF!	0*	#REF!	0.117521	#REF!	10.42407*	0*	3	1.96121
College Students	#REF!	#REF!	#REF!	#REF!	#REF!	#REF!	0.140906	0.170075	0*	0*	2	Q=0.99999999999999
All	0.575727	0.185683	0.543157	1.22337e-09	15.0732	0.0486758	0.236282	#VALUE!	50.7043	0	14
PI = possible underlying effect size in a new study that is similar to the studies in meta-analysis
PI= Related to heterogenity					0.0499958	0.0249979	0.975002
CI = Range where true G value is up with a 95% accuracy with the range
P= Probability that the value is actually 0/ value achieved through random error and true value is 0
I^2 = An estimated measure of heterogenity not accounted for by Tau
Tau = Interstudy variance (variance between study and is an estimate of the heterogenity in the underlying random effect
Q P-Value = A statistical test that checks the hypothesis that all paper's populations true means are the same (assess heterogenity)
Tau^2 P-Value = A statistical test checking the hypothesis that Tau^2 =0
All negative I^2 values were rounded to 0 as negative I^2 is impossible
* - Values are invalid due to 0 values or not enough papers to calculate properly
	G	Upper 95%	Lower 95%	Position	lower error	Upper error
Consumers (n=8)	0.577262	0.178125	0.178125	0.5		0.178125
Food Workers (n=5)	0.379383	0.159189	0.159189	1.5		0.159189
Kitchen Food Workers (n=3)	0.613705	0.464578	0.464578	2.5		0.464578
Students (n=5)	0.719826	0.297348	0.297348	3.5		0.297348
Young Students (n=3)	0.65499	0.344955	0.344955	4.5		0.344955
College Students (n=2)	0.965398	0.92516	0.92516	5.5		0.92516
All (n=14)	0.575727	0.185683	0.185683	6.5		0.185683

## Sheet: Random-Effects analy sum(practi
Group	Average Hedge's G	CI range	PI Range	P value	I^2	Tau^2	Tau^2 P-Value	Q P-Value	Upper I^2 95% CI	Lower I^2 95% CI	Number of Papers
Consumers	0.350223	0.284236	3.85208	0.0431977	0	0.0459546	0.0682253	#VALUE!	83.622688185842*	0	3	Q=2.84347
Students	0.304557	0.320841	4.02278	0.141343	4.49228	0.0734397	0.161224	#NAME?	24.8259	0	3
All	0.420338	0.222491	0.6582	0.000840468	0	0.0433144	0.144152	0.226858	65.1039*	0	6	Q=3.07091
PI = possible underlying effect size in a new study that is similar to the studies in meta-analysis
PI= Related to heterogenity
CI = Range where true G value is up with a 95% accuracy with the range
P= Probability that the value is actually 0
I^2 = An estimated measure of heterogenity not accounted for by Tau
Tau = Interstudy variance (variance between study and is an estimate of the heterogenity in the underlying random effect
	G	Upper 95%	Lower 95%	Position
Consumers (n=5)	0.380757	0.195818	0.195818	0.5		0.195818
Students (n=3)	0.304557	0.320841	0.320841	1.5		0.320841
All (n=5)	0.420338	0.222491	0.222491	2.5		0.222491

## Sheet: Random-Effects analy sum(Attit)
Group	Average Hedge's G	CI range	PI Range	P value	I^2	Tau^2	Tau P Value	Q P-Value	Upper I^2 95% CI	Lower I^2 95% CI	Number of Papers
Consumers	0.332991	0.196465	0.918888	0.00320286	0.772702	0.0355617	0.0817893	#VALUE!	5.73888	0	4
Food Workers	0.348808	0.260717	1.69016	0.0256326	0	0	0.05*	#VALUE!	66.5197*	0	2	Q=0.80656
Students	0.229849	0.282197	1.18469	0.223114	2.75676	0.0550823	0.083804	#NAME?	16.5841	0	3		0.975
All	0.291597	0.264743	0.745314	0.0776131	0	0.0538162	0.141618	#VALUE!	78.1851	0	5			4.30265
		0.975002											0.05	0.0707992
													0.95
PI = possible underlying effect size in a new study that is similar to the studies in meta-analysis
PI= Related to heterogenity
CI = Range where true G value is up with a 95% accuracy with the range
P= Probability that the value is actually 0
I^2 = An estimated measure of heterogenity not accounted for by Tau
Tau = Interstudy variance (variance between study and is an estimate of the heterogenity in the underlying random effect
						`
	G	Upper 95%	Lower 95%	Position
Consumers (n=4)	0.332991	0.196465	0.196465	0.5	0.196465
Food Workers (n=2)	0.348808	0.260717	0.260717	1.5	0.260717
Students (n=3)	0.229849	0.282197	0.282197	2.5	0.282197
All (n=5)	0.291597	0.264743	0.264743	3.5	0.264743

## Sheet: Consumers K no serv safe forest
Papers	Hedge's G	Hedge's G SE	N( sum of Ns)	Initial Weight	Weighted Hedge's g	Final Mean	Final Tau	Distance from mean	Sum of Weights	Diff of variance	T's	Ranks T	Rank V	Variances	Rev Rank	Rev Rank V	X	Y	C	D	C-D	Z	Number of Studies	P		squared weights	Sum square weights	C
M2	0.35762	0.0918717	480	5.65256	2.02147	0.577262	0.168471	-0.219642	35.0779	0.148403	-0.570156	6	3	0.176911	6	7	4	3	14	14	0	0	8	0.601058		31.9514	135.903	-8.98782
M4	0.74111	0.374072	29	3.24254	2.40308			0.163848		0.279892	0.309703	4	4	0.3084	4	3	4	3								10.5141
m5	0.27591	0.25162	63	4.31438	1.19038			-0.301352		0.203275	-0.668393	7	5	0.231783	7	4	2	5								18.6139
M11	1.06939	0.460484	20	2.62801	2.81037			0.492129		0.352008	0.829474	1	1	0.380516	1	1	7	0								6.90643
M12	-0.0572	0.421134	60	2.89164	-0.165402			-0.634462		0.317317	-1.12631	8	2	0.345825	8	2	1	6								8.36157
M13	0.841526	0.168471	76	5.07993	4.2749			0.264264		0.168345	0.644078	2	6	0.196853	2	5	4	3								25.8057
M10	0.723856	0.0605256	581	5.80943	4.20519			0.146594		0.143626	0.386812	3	8	0.172134	3	8	2	5								33.7495
M7	0.550342	0.121242	371	5.4594	3.00454			-0.0269198		0.154662	-0.068451	5	7	0.18317	5	6	4	3
	x	y		x	y										Tn+1-Tn/1+Tn <0.00001
	0.577262	0		0.577262	0												X is the number of studies ranked above both values and ranked below both values
	1.55726	0.5		0.577262	0.5												14	14
	x	y
	0.577262	0
	-0.402738	0.5
	G	Lower 95%	Upper 95%	Position	lower error	Upper error
Overall	0.577262	0.399137	0.755387	0.5	0.178125	0.178125
M2	0.35762	0.177551	0.537689	1.5	0.180069	0.180069
M4	0.74111	0.00792913	1.47429	2.5	0.733181	0.733181
m5	0.27591	-0.217264	0.769084	3.5	0.493174	0.493174
M11	1.06939	0.166842	1.97194	4.5	0.902549	0.902549
M12	-0.0572	-0.882623	0.768223	5.5	0.825423	0.825423
M13	0.841526	0.511324	1.17173	6.5	0.330202	0.330202				.
M10	0.723856	0.605226	0.842486	7.5	0.11863	0.11863
M7	0.550342	0.312707	0.787977	8.5	0.237635	0.237635
		0.562119	0.592405	0.5	0.015143	0.015143
	Se	0.0908802	0.015143	PI
					0

## Sheet: Consumers Knowledge Plot
Papers	Hedge's G	Hedge's G SE	N( sum of Ns)	Initial Weight	Weighted Hedge's g	Final Mean	Final Tau	Distance from mean	Sum of Weights	Diff of variance	T's	Ranks T	Rank V	Variances	Rev Rank	Rev Rank V	X	Y	C	D	C-D	Z	Number of Studies	P		squared weights	Sum square weights	C
M2	0.35762	0.0918717	480	9.96889	3.56507	0.782543	0.0918717	-0.424923	65.7033	0.0850922	-1.45669			0.100312	8	8	6	2	18	14	4	0.417029	9	0.634283		99.3787	450.339	-41.0376
M4	0.87029	0.378839	29	4.24826	3.69722			0.0877462		0.220171	0.187003			0.235391	3	3	6	2								18.0477
m5	0.27591	0.25162	63	6.44396	1.77795			-0.506633		0.139964	-1.35421			0.155184	7	4	3	5								41.5246
M11	1.06939	0.460484	20	3.29037	3.51869			0.286848		0.288697	0.533864			0.303917	2	1	7	1								10.8265
M12	-0.0572	0.421134	60	3.71435	-0.212461			-0.839743		0.254006	-1.66619			0.269226	9	2	1	7								13.7964
M13	0.841526	0.168471	76	8.31573	6.9979			0.0589829		0.105034	0.181996			0.120254	4	5	5	3								69.1513
M10	0.723856	0.0605256	581	10.4674	7.57686			-0.0586875		0.0803151	-0.207084			0.0955351	5	9	4	4								109.566
M7	0.550342	0.121242	371	9.38338	5.16407			-0.232201		0.0913515	-0.768258			0.106571	6	6	4	4								88.0479
M14	2.22767	0.0971344	343	9.87101	21.9893			1.44512		0.0860869	4.92534			0.101307	1	7	2	6
				SE	G
	y2	x2		y	x							Hedge's G	95% Left	95% right	Plot Left	Plot Right	Pos
	0	0.782543		0.5	0.782543						Overall	0.782543	0.336307	1.22878	0.446237	0.446237	0.5
	0.5	1.76254		0	0.782543						M2	0.35762	0.177551	0.537689	0.180069	0.180069	1.5
											M4	0.87029	0.127766	1.61281	0.742524	0.742524	2.5
											m5	0.27591	-0.217264	0.769084	0.493174	0.493174	3.5
											M11	1.06939	0.166842	1.97194	0.902549	0.902549	4.5
	y3	x3									M12	-0.0572	-0.882623	0.768223	0.825423	0.825423	5.5
	0	0.782543									M13	0.841526	0.511324	1.17173	0.330202	0.330202	6.5
	0.5	-0.197457									M10	0.723856	0.605226	0.842486	0.11863	0.11863	7.5
											M7	0.550342	0.312707	0.787977	0.237635	0.237635	8.5
						z					M14	2.22767	2.03728	2.41805	0.190383	0.190383	9.5
											SE Overall	0.227672
	x	y		x	y
	0.581745	0		0.581745	0
	1.56175	0.5		0.581745	0.461
						m10 is median
	x	y				M2 is lower fourth
	0.581745	0				m4 is upper fourth		1.5FS+Upper fourth
	-0.398255	0.5				Fs	1.5FS	1.63929
						0.51267	0.769004
	G	95% left	95% Right	Error	Pos		3FS
Overall	0.782543	0.336307	1.22878	0.446237	0.5		1.53801	2.4083
M2	0.35762	0.177551	0.537689	0.180069	1.5
M4	0.87029	0.127766	1.61281	0.742524	2.5
m5	0.27591	-0.217264	0.769084	0.493174	3.5
M11	1.06939	0.166842	1.97194	0.902549	4.5
M12	-0.0572	-0.882623	0.768223	0.825423	5.5
M13	0.841526	0.511324	1.17173	0.330202	6.5
M10	0.723856	0.605226	0.842486	0.11863	7.5
M7	0.550342	0.312707	0.787977	0.237635	8.5
M14	2.22767	2.03728	2.41805	0.190383	9.5
Overall se	0.227672
					0

## Sheet: Consumers Knowledge no servsafe
Papers	Hedge's G	Hedge's G Variance	N( sum of Ns)		Initial Weight	Weighted Hedge's g	Initial Weighted Average Hedge's g	Initial Tau	Number of Papers	Tau's	Fin Mean	Fin Var	I^2	Final SE	Final Tau	Final I^2	(remember to multiply by 100)		gs squared	weighted squares	sum1	sum weighedmeans	Sum weights	Q	df	squared weights	Sum square weights	C
M11	1.06939	0.212046	20		4.71597	5.04321	0.742312	1.1	3	0.342406	0.742312	0.00319567	-21.0825	0.0565303	0	0	T-value for tau	Probability			173.374	232.287	312.923	0.944318	2		75778.6	70.7601
M13	0.841526	0.0283823	76		35.2332	29.6496				0.101627			-38.7146				0	1
M10	0.723856	0.00366335	581		272.974	197.594				0.0324763			-14.0404			Q
										0.0127503			-5.90778			0.944318			1.1436	5.39317						22.2403
										0.00626428			-3.13742						0	0						0
										0.00346343			-2.06704						0.708167	24.951						1241.38
										0.0019405			-1.62544						0.523967	143.03						74514.9
										0.000983823			-1.41073						0	0						0
										0.000324811			-1.28613		Tn+1-Tn/1+Tn <0.00001
										0			-1.20462
										0			-1.14689							HYPOTHESIS TESTING OF TAU^2 = 0
												New Weights		Chi-Squared Value		Dist from mean	Diff of Squares	Weighed Diff of Sqaures	Lambda	#VALUE!
														5.99146			0	0	0.944318	P-Value for All same sample pop
																	0	0		#VALUE!
																	0	0		Can't deny homogeneity
												4.71597				0.327079	0.106981	0.504517				TEST STATISTIC Q for Heterogeneity
																-0.742312	0.551028	0				Check if I need to recalc C and weights with Tau
												35.2332				0.099214	0.00984343	0.346815				Test Tau as Null… Better than T-test due to distribution
												272.974				-0.0184564	0.000340638	0.0929855				5.99146				Sum of Weights		Weights Cubed	Sum of weights cubed
																-0.742312	0.551028	0				Chi-sqaured at DOF				312.923		0	2.03845e+07
						z																r	Uq	Sq^2	Calc1	Calc 2	Calc 3	0
																						1	2	4	4	0	0	0
																												104.885
																						M						0
																						0.5						43737.6
																							P	Indicates Tau not 0				2.03407e+07
																						0.95	0.05					0
																						New Weighted Means	gs squared	weighted squares	sum1	sum weighedmeans	Sum weights	Q	df	squared weights	Sum square weights	C
																									173.374	232.287	312.923	0.944318	2	0	75778.6	70.7601
																														0
																														0
															Construct i^2 intervals							5.04321	1.1436	5.39317						22.2403
												Z at a = 0.95	H	SE ln(H)			Interval for H	I's				0	0	0						0
												1.64485	0.687138	1.04876	-0.0572925	ln Q	3.8568	93.2773	Upper I			29.6496	0.708167	24.951						1241.38
															0.693147	ln DOF	0.122422	-6572.34	Lower I			197.594	0.523967	143.03						74514.9
													I		-0.357774	Denom						0	0	0						0
													-111.793
					0

## Sheet: Consumers Knowledge
Papers	Hedge's G	Hedge's G Variance	N( sum of Ns)		Initial Weight	Weighted Hedge's g	Initial Weighted Average Hedge's g	Initial Tau	Number of Papers	Tau's	Fin Mean	Fin Var	I^2	Final SE	Final Tau	Final I^2	(remember to multiply by 100)		gs squared	weighted squares	sum1	sum weighedmeans	Sum weights	Q	df	squared weights	Sum square weights	C
M2	0.35762	0.00844041	480		118.478	42.37	0.880851	0.518276	9	0.408466	0.782543	0.0518345	-0.299733	0.227672	0.408466	-6.14764	T-value for tau	Probability	0.127892	15.1524	741.59	558.299	633.818	249.811	8	14037	106007	466.567
M4	0.87029	0.143519	29		6.96773	6.06394				0.40444			-0.334789				1.7941	0.110545	0.757404	5.27738						48.5492
m5	0.27591	0.0633124	63		15.7947	4.35792				0.404355			-0.0711704						0.0761263	1.20239						249.472
M11	1.06939	0.212046	20		4.71597	5.04321				0.404353			-0.0614764			7.53813			1.1436	5.39317						22.2403
M12	-0.0572	0.177354	60		5.63844	-0.322519													0.00327184	0.0184481						31.792
M13	0.841526	0.0283823	76		35.2332	29.6496													0.708167	24.951						1241.38
M14	2.22767	0.0094351	343		105.987	236.104													4.96249	525.961						11233.3
M10	0.723856	0.00366335	581		272.974	197.594													0.523967	143.03						74514.9
M7	0.550342	0.0146997	371		68.0287	37.439									Tn+1-Tn/1+Tn <0.00001				0.302876	20.6043						4627.9
																				TAU^2 Hypothesis testing for H0: Tau^2=0, HA: Tau^2 >0
				0.212046	0.79371							New Weights		Chi-Squared Value		Dist from mean	Diff of Squares	Weighed Diff of Sqaures	Lambda	#VALUE!
				0	0.79371							2.39862		15.5073		-0.424923	0.18056	0.433094	7.46847	P-Value for All same sample pop
												1.81164				0.0877462	0.0076994	0.0139486		#VALUE!
												2.11964				-0.506633	0.256677	0.544063		Can't deny homogeneity		(Result was non-significant ar p=0.05)
												1.61157				0.286848	0.0822817	0.132603
												1.70701				-0.839743	0.705169	1.20373				TEST STATISTIC Q for Heterogeneity
												2.28912				0.0589829	0.00347899	0.00796383				Test Tau as Null… Better than T-test due to distribution
												2.39291				1.44512	2.08838	4.99729				15.5073						Weights Cubed	Sum of weights cubed
												2.42642				-0.0586875	0.00344422	0.00835713				Chi-sqaured at DOF						13.8001	91.6081
						z						2.36314				-0.232201	0.0539174	0.127414				r	Uq	Sq^2	Calc1	Calc 2	Calc 3	5.9459
																						2.3055	14.9238	96.6037	16	27.6953	52.9085	9.52324
																												4.18552
																						M						4.974
																						0.154485						11.9952
																							P	Indicates Tau not 0				13.7018
																						0.609981	0.390019					14.2856
																												13.1968
																						New Weighted Means	gs squared	weighted squares	sum1	sum weighedmeans	Sum weights	Q	df	squared weights	Sum square weights	C
																						0.857794	0.127892	0.306764	19.1718	14.9589	19.1201	7.46847	8	5.75337	41.4773	16.9508
																						1.57665	0.757404	1.37215						3.28205
																						0.584829	0.0761263	0.16136						4.49286
															Construct i^2 intervals							1.7234	1.1436	1.84299						2.59717
												Z at a = 0.95	H	SE ln(H)			Interval for H	I's				-0.0976408	0.00327184	0.00558505						2.91387
												1.64485	0.970704	-3.02394	2.01997	ln Q	0.00671324	-2.21879e+06	Upper I			1.92636	0.708167	1.62108						5.24008
															2.07944	ln DOF	140.359	99.9949	Lower I			5.3306	4.96249	11.8748						5.72601
													I		0.00983276	Denom						1.75638	0.523967	1.27137						5.88752
													-6.12711									1.30053	0.302876	0.715739						5.58442
					0

## Sheet: Consumers Attitude Plot
Papers	Hedge's G	Hedge's G SE	N( sum of Ns)	Initial Weight	Weighted Hedge's g	Final Mean	Final Tau	Distance from mean	Sum of Weights	Diff of variance	T's	Ranks T	Rank V	Variances	Rev Rank	Rev Rank V	X	Y	C	D	C-D	Z	Number of Studies	P	df	squared weights	Sum square weights	C
M5	0.499234	0.0469418	63	20.3478	10.1583	0.782543	0.0469418	-0.283309	78.0266	0.0363292	-1.48639			0.0491454	2	3	2	1	4	2	2	0.679366	4	0.683271	77.0266	103.191	207.19	-47.7975
M7	0.522281	0.121075	371	16.2335	8.47845			-0.260263		0.0487848	-1.17834			0.061601	1	1	3	0								71.8842
M12	0.253935	0.0288536	61	20.9317	5.31531			-0.528608		0.0349582	-2.82722			0.0477744	3	4	2	1								28.2525
M10	0.099015	0.0586695	581	19.8476	1.96521			-0.683528		0.0375678	-3.52654			0.0503839	4	2	1	2								3.86205
	x	y		x	y
	0.332984	0		0.332984	0.13
	0.0781843	0.13		0.332984	0										Tn+1-Tn/1+Tn <0.00001
	x	y
	0.332984	0
	0.587784	0.13
	Hedge's G	95% Left	95% Right	Error	Position
Overall	0.332991	0.136526	0.529456	0.196465	0.5
M5	0.499234	0.407228	0.59124	0.092006	1.5
M7	0.522281	0.284974	0.759588	0.237307	2.5
M12	0.253935	0.197382	0.310488	0.056553	3.5
M10	0.099015	-0.0159772	0.214007	0.114992	4.5
	0.0151201	0.317871		0.0151201
	0.100237

[truncated: 24 more sheets: Consumers Attitude, Consumers Practices Plot, Consumers Practices, Food Workers (K) no serv plot, Food Workers (K) no servsafe, Food Workers (Knowledge) Plot, Food Workers (Knowledge), Food Workers (attitudes), Kitchen Food Workers Plot, Kitchen Food Workers, Students (Know) Plot, Students (Know), Students (Attitudes) Plot, Students (Attitudes), Students(Practices) Plot, Students(Practices), All(Know), All(Know) Plot, All (K) No outlier, All(Know) Plot no outlier …]
